# Supplementary material for: Macrophage Niche Reconstitution Reveals Dynamic Transcriptional and Communication Networks Renal Macrophage-Epithelial Communication
Source: Research Square preprint supplement (doi:10.21203/rs.3.rs-8467072/v1), 2026-01-16
Supplement: Supplementary file 1 [file 023e27b504f5c46baf9b3746.docx]

**SUPPLEMENTARY MATERIALS**

**a**

**b**

**c**

**Supplementary Figure 1: Landscape for cell compartments and sample construction of the single-cell RNA data of kidney tissues from mice model: (a)** Uniform manifold approximation and projection (UMAP) embeddings of total 27,396 mice renal cells from 5 time points after quality control and removal of batch effects. We identified total 7 major cell types and Proximal Tubular Cell (PTC) separate to PTC1 and PTC2 based on unsupervised clustering and mitochondrial percentage difference. The 2 color tracks in the circular plots (from outside to inside) indicate cell type and sample information. **(b)** Dot plot of top differentially expressed genes and known cell markers for each renal cell types. **(c)** Stacked bar plot showing the distribution of major cell types across 5 time points, percentage of renal macrophage dramatically decrease from D0 to D1 then gradually generate back from D1 to D7. Abbreviations: Proximal Tubular Cell (PTC), Distal Tubular Cell (DTC), Loop of Helene (LOH), Macrophage (Macro), T Cell (T), B Cell (B).

**Supplementary Figure 2: Visualization of single-cell gene-expression dynamics across ILY-treated mouse kidneys.** Heatmap showing the top 30 upregulated (red) and top 30 downregulated (blue) differentially expressed genes (DEGs) identified in Bulk kidney cell populations, PTC1, PTC2, and Cx3cr1⁺ cell populations, profiled by scRNA-seq. Genes were ranked according to the mean log₂ fold-change (log₂FC) across the three time-point comparisons (D1 vs D0, D3 vs D0, and D7 vs D0). The heatmap illustrates consistent expression trends across groups, highlighting transcriptional responses to ILY treatment at the single-cell level.
